# Supplementary material
Source: publisher site journal article supplement (https://www.spandidos-publications.com/6747/downloadSupplementary)

Figure S1. Cardiac magnetic resonance image before ablation, indicating late gadolinium enhancement in the anterior wall.

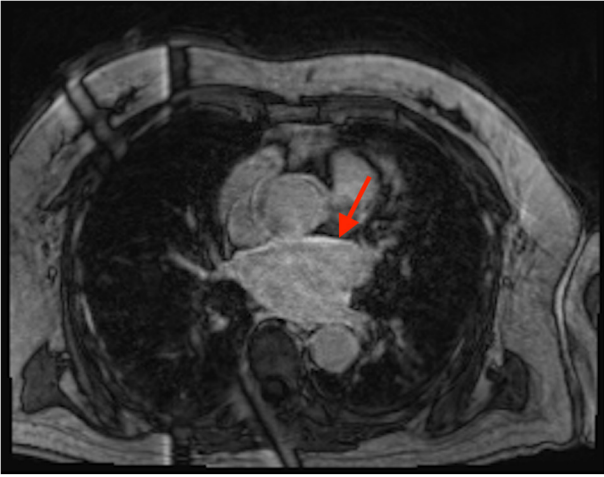

Supplement: Supplementary file 1 [file downloadSupplementary]
